# Supplementary material for: Density Functional Theory and Density Functional Tight Binding Studies of Thiamine Hydrochloride Hydrates
Source: MDPI journal article supplement (doi:10.3390/molecules28227497), 2023-11-09
Supplement: s1 [file s1]

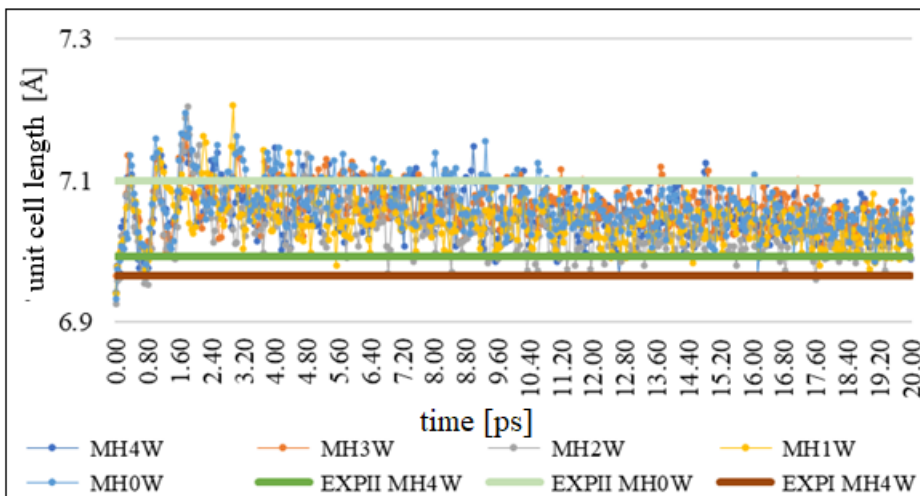

**A1** „a” unit cell length of NSH

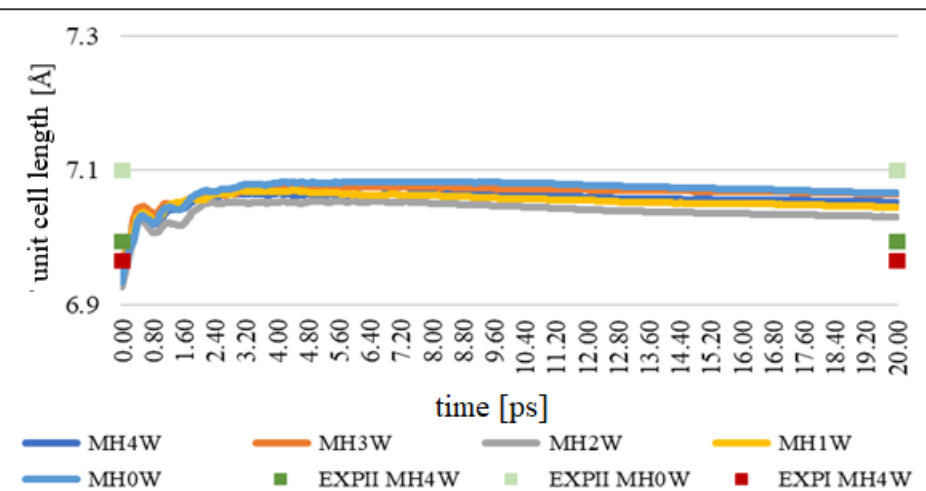

**A2** „a” unit cell length of NSH, running average

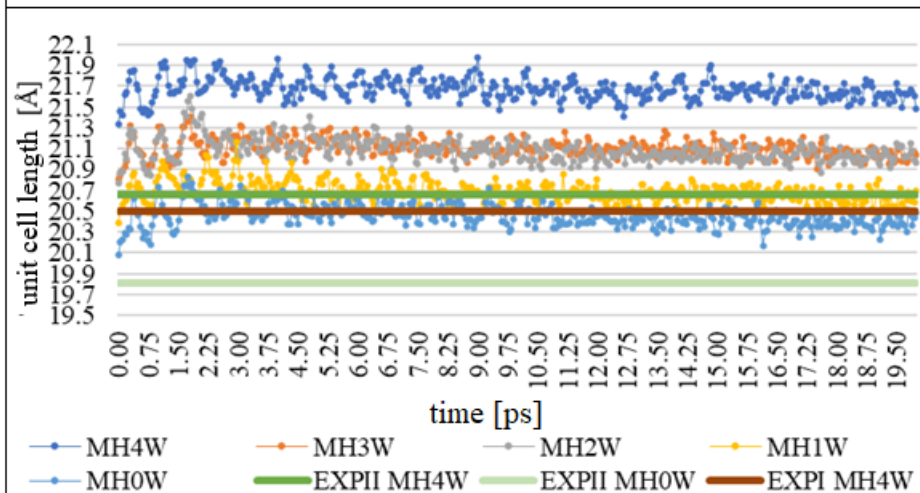

**B1** „b” unit cell length of NSH

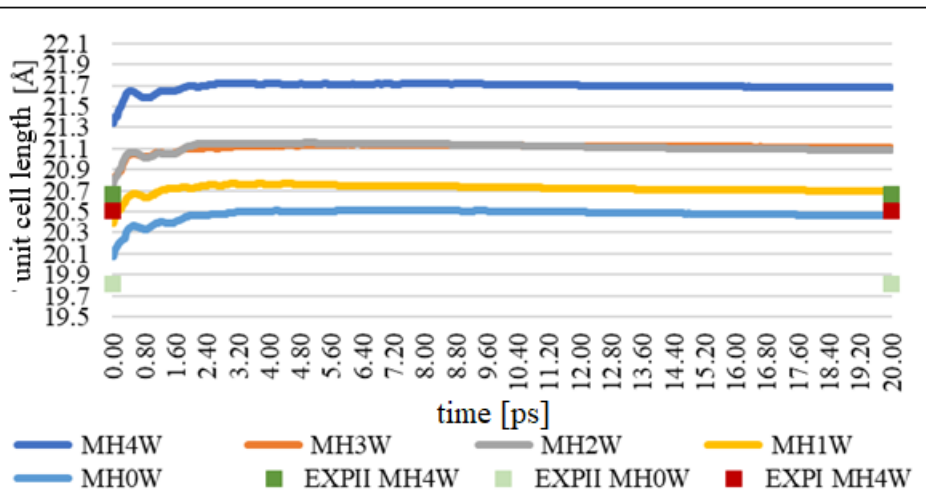

**B2** „b” unit cell length of NSH, running average

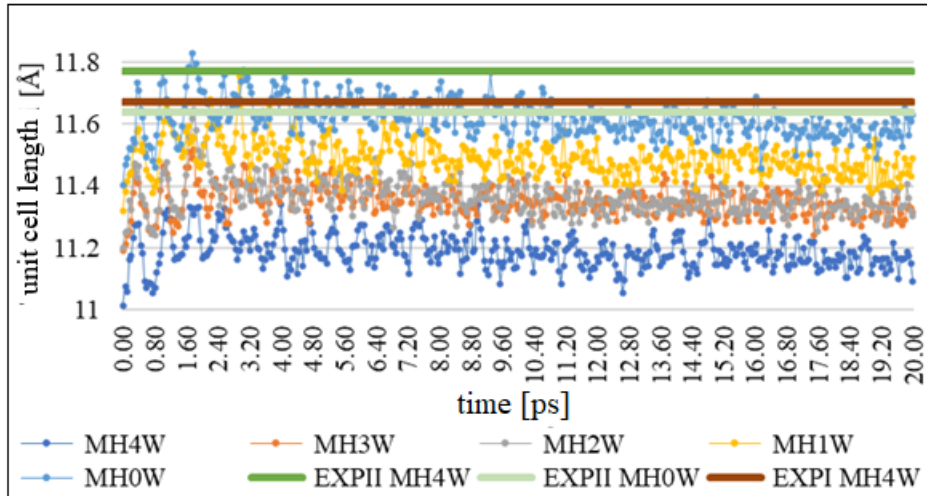

**C1** „c” unit cell length of NSH

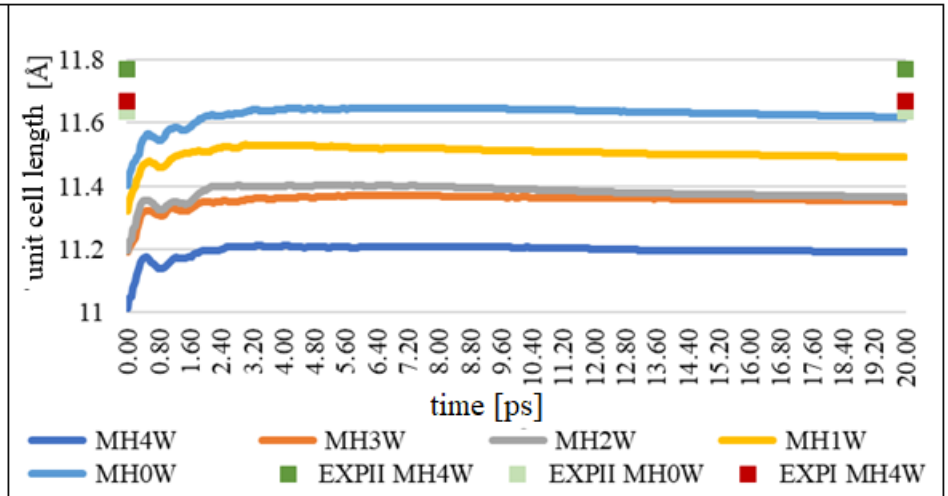

**C2** „c” unit cell length of NSH, running average

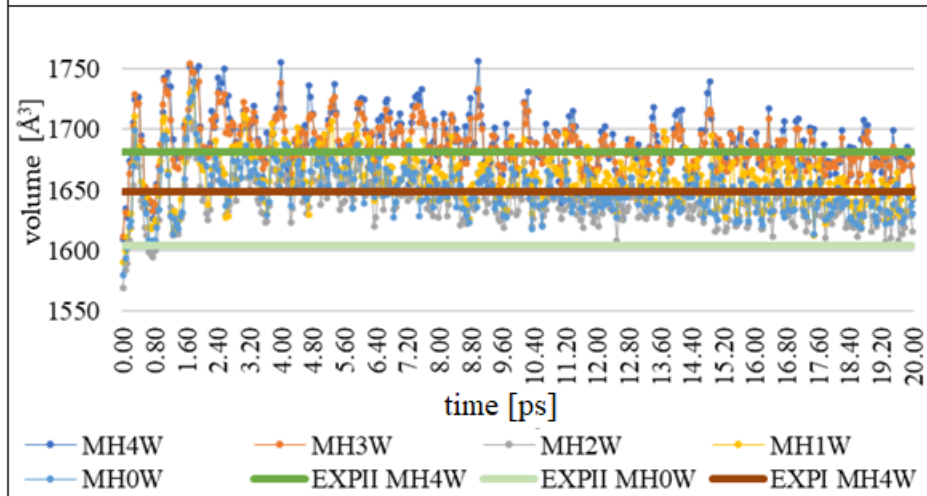

**D1** unit cell volume of NSH

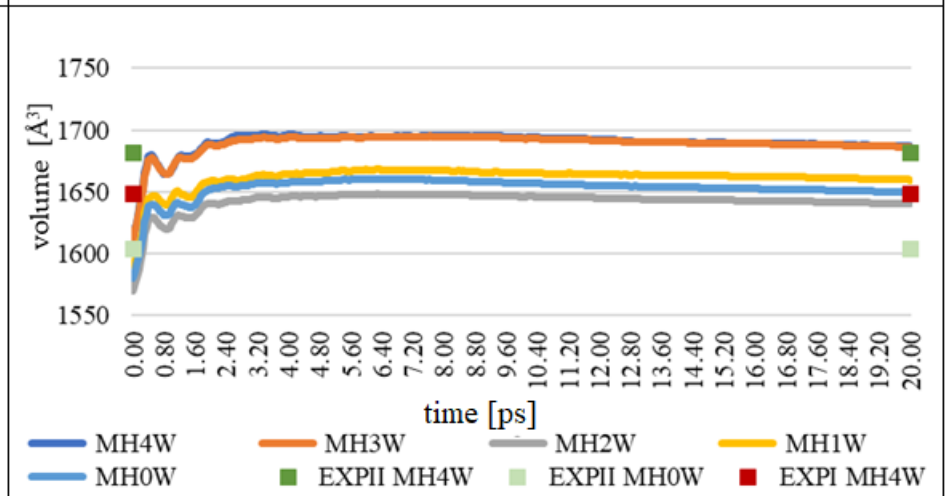

**D2** unit cell volume of NSH, running average

**Figure S1.** Changes in the unit cell dimensions of NSH observed during the molecular dynamics simulations.

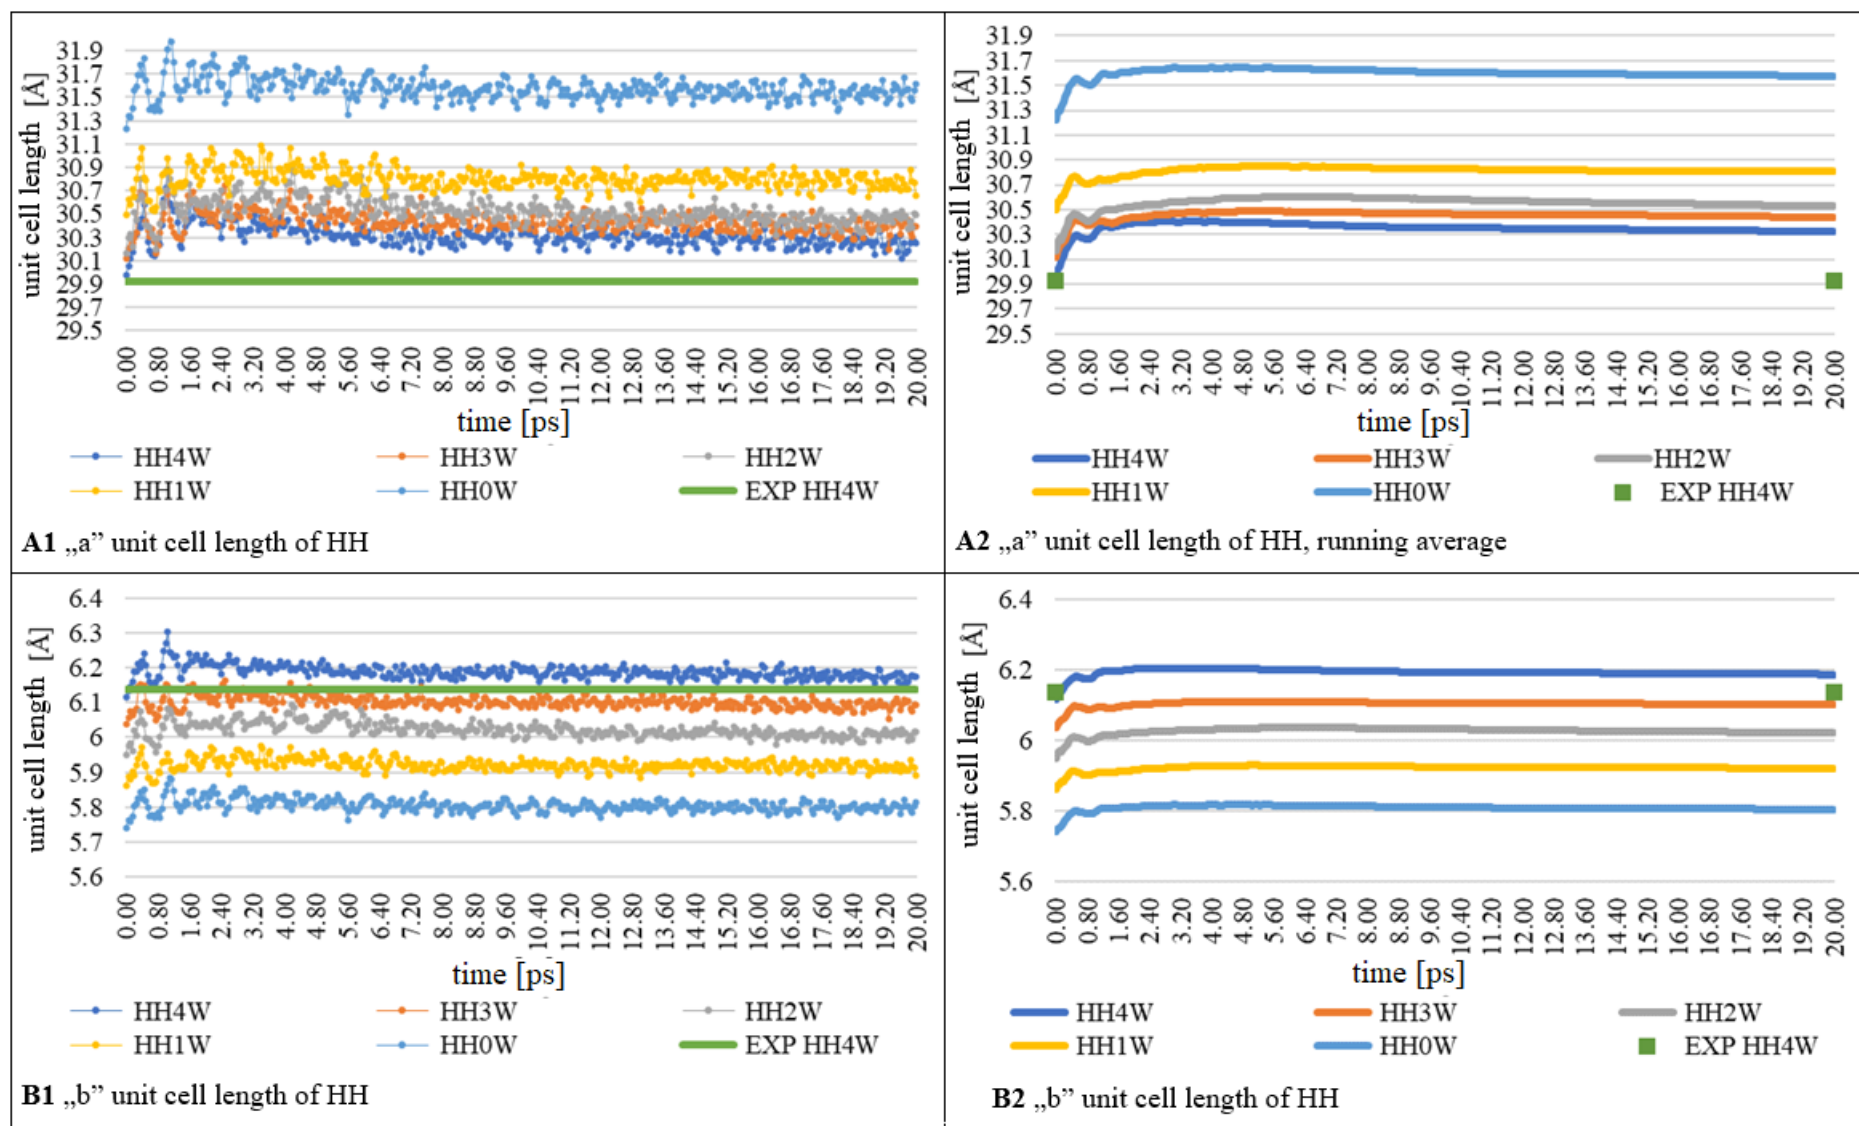

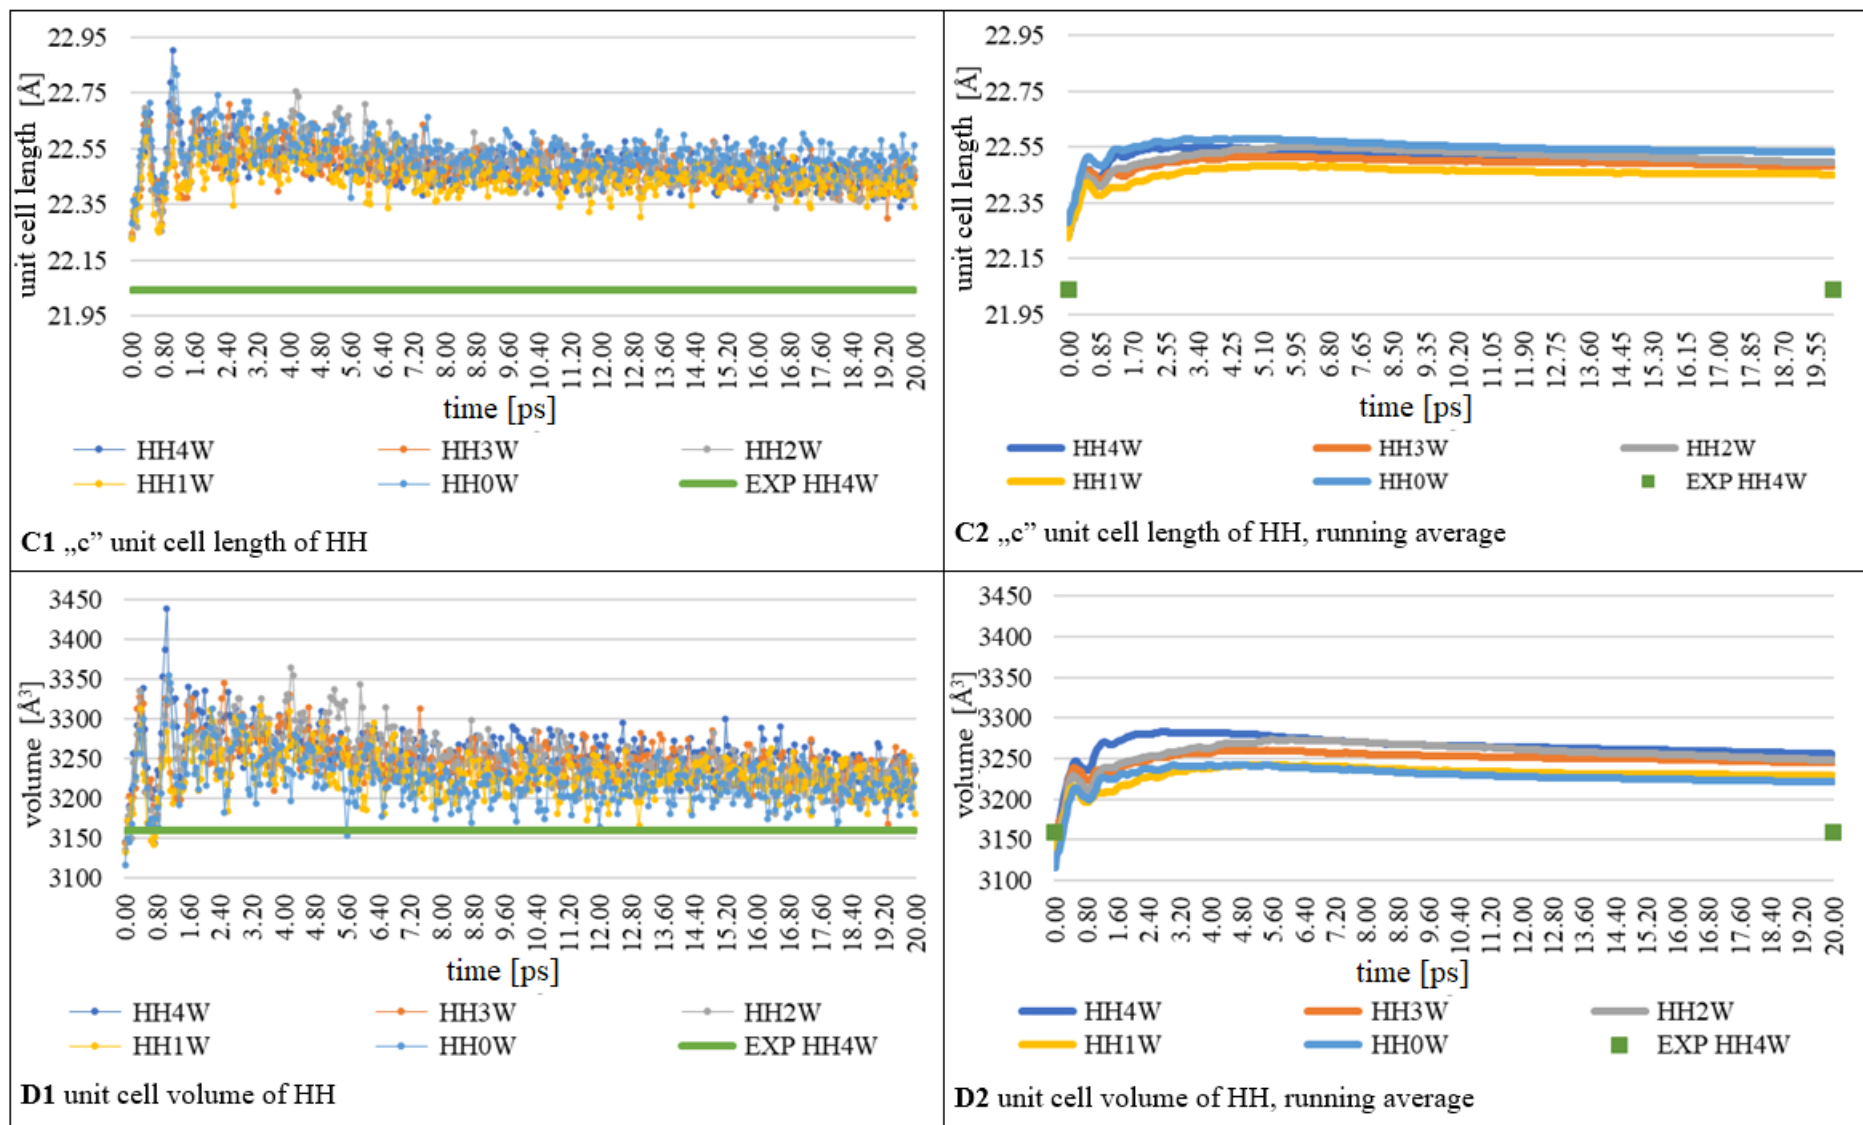

**Figure S2.** Changes in the unit cell dimensions of HH observed during the molecular dynamics simulations.
